# Supplementary material for: A Novel Human Pluripotent Stem Cell-Derived Neural Crest Model of Treacher Collins Syndrome Shows Defects in Cell Death and Migration
Source: PubMed Central journal article supplement (PMC6350417; doi:10.1089/scd.2017.0234), 2019-01-10
Supplement: Supp_Fig5.pdf [file Supp_Fig5.pdf]

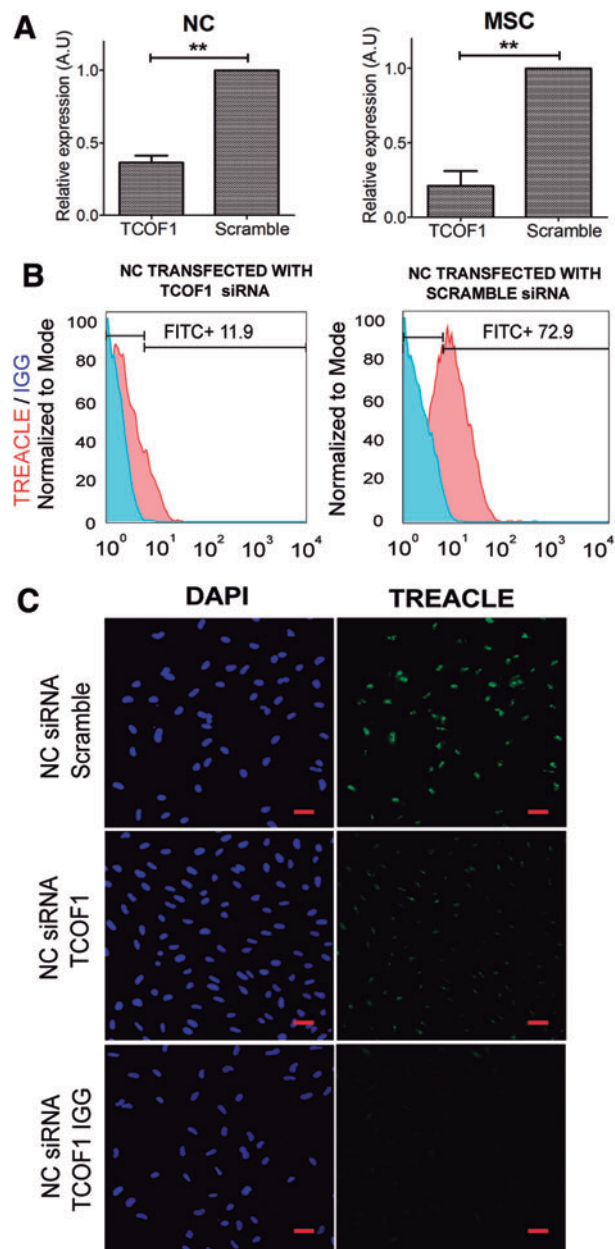

**SUPPLEMENTARY FIG. S5.** TCOF1 siRNA transient transfection in NC and MSC downregulates Treacle protein. (A) qRT-PCR showing the expression levels of TCOF1 in HESC-derived NC cells transfected with either TCOF1 siRNA or Scrambled siRNA (*left*). qRT-PCR showing the expression levels of TCOF1 in wild-type NC-derived MSC transfected with TCOF1 siRNA or scramble siRNA (*right*). The relative mRNA level was normalized to the house-keeping gene *PBGD*. The results are presented as mean  $\pm$  SD of three independent experiments.  $**P < 0.01$ , two-sided Student's *t*-test. (B) Histogram of the percentage of Treacle positive cells determined by flow cytometry analysis in HESC-derived NC cells transfected with TCOF1 siRNA or scrambled siRNA. Red histograms represent Treacle staining, and blue histograms represent IgG isotype controls. (C) Immunocytochemistry for Treacle protein (TCOF1) in HESC-derived NC transfected with either TCOF1 siRNA or Scramble siRNA. IgG is shown as a negative control. Scale bar 20  $\mu$ m. siRNA, small interfering RNA.
