# Supplementary material for: A Novel Human Pluripotent Stem Cell-Derived Neural Crest Model of Treacher Collins Syndrome Shows Defects in Cell Death and Migration
Source: PubMed Central journal article supplement (PMC6350417; doi:10.1089/scd.2017.0234), 2019-01-10
Supplement: Supp_Fig6.pdf [file Supp_Fig6.pdf]

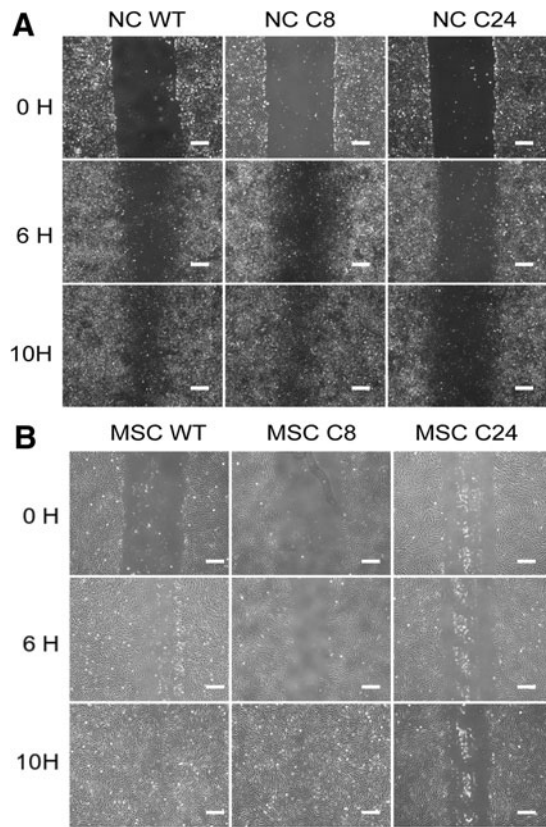

**SUPPLEMENTARY FIG. S6.**  $TCOF1^{+/-}$  HIPSC-derived MSC show a defect in cell migration. **(A)** Representative images of scratch wound assay performed in  $TCOF1^{+/+}$  NC derived from H9s (WT), HIPSC (C8), and NC derived from  $TCOF1^{+/-}$  HIPSC (C24). Pictures were obtained at the indicated time points. Scale bar 100  $\mu$ m. **(B)** Representative images of scratch assays carried out in MSC derived from NC  $TCOF1^{+/+}$  (WT, C8) and NC  $TCOF1^{+/-}$  (C24). Pictures were obtained at the indicated time points. Scale bar 100  $\mu$ m.
