# Supplementary material for: A Novel Human Pluripotent Stem Cell-Derived Neural Crest Model of Treacher Collins Syndrome Shows Defects in Cell Death and Migration
Source: PubMed Central journal article supplement (PMC6350417; doi:10.1089/scd.2017.0234), 2019-01-10

SUPPLEMENTARY TABLE S1. QUANTITATIVE REAL-TIME POLYMERASE CHAIN REACTION PRIMERS USED TO MEASURE THE EXPRESSION LEVELS OF THE GENES LISTED

**A**

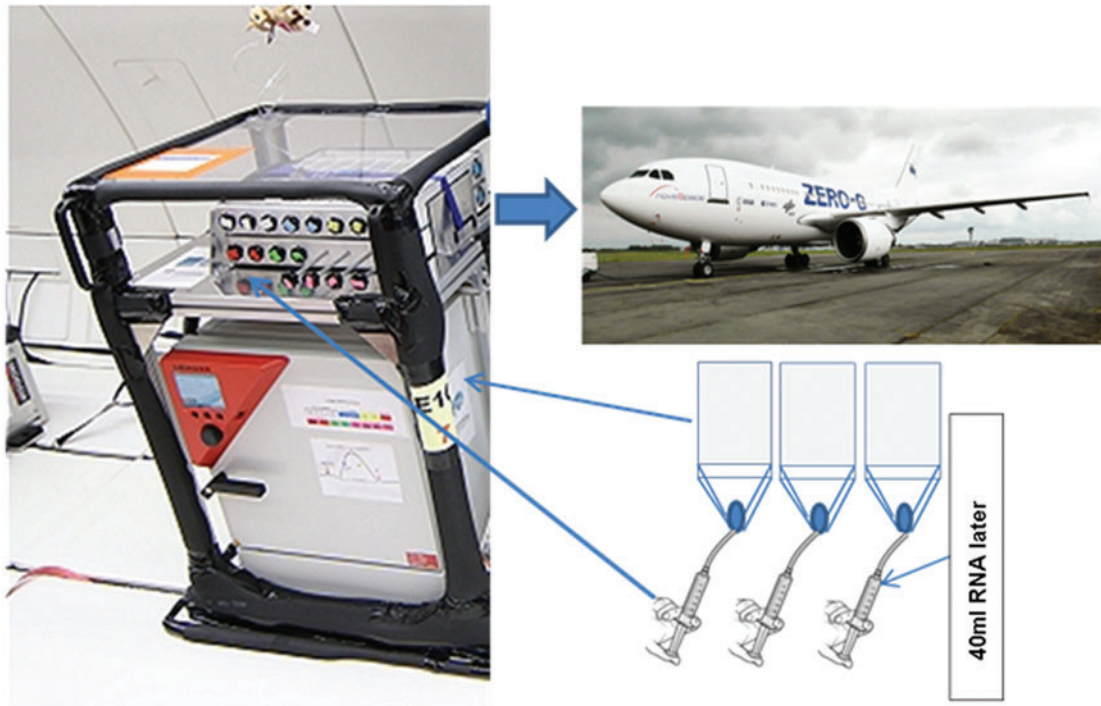

**B**

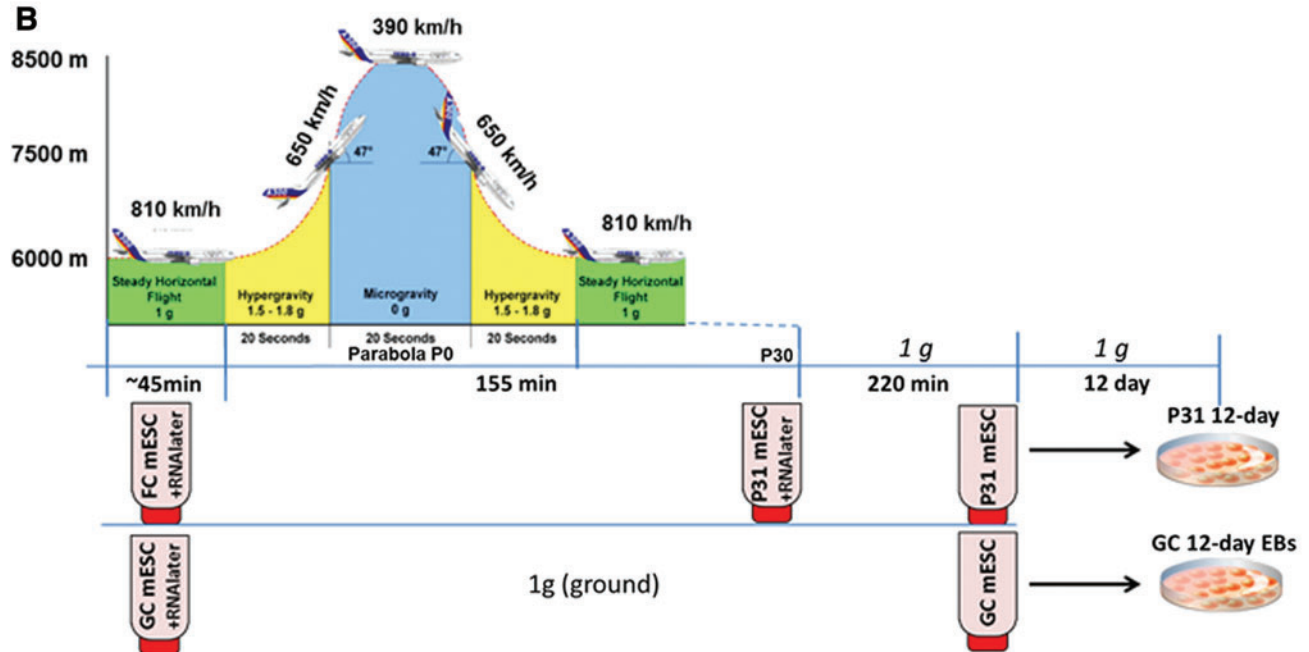

Supplement: Supp_Table1.pdf [file Supp_Table1.pdf]
